# Supplementary material for: Stability of Blueberry Extracellular Vesicles and Their Gene Regulation Effects in Intestinal Caco-2 Cells
Source: MDPI journal article supplement (doi:10.3390/biom13091412), 2023-09-19
Supplement: s1 [file s1]

## Stability of Blueberry Extracellular Vesicles and Their Gene Regulation Effects in Intestinal Caoco-2 Cells

**Table S1. Primer Sequences Used for Quantitative RT-PCR**

| Primer                 | Sequence (5'to3')              |
|------------------------|--------------------------------|
| IL-10 F                | tct ccg aga tgc ctt cag cag a  |
| IL-10 R                | tca gac aag gct tgg caa ccc a  |
| IL2RA F                | gag act tcc tgc ctc gtc aca a  |
| IL2RA R                | gat cag cag gaa aac aca gcc g  |
| TLR5 F                 | cct tac agc gaa cct cat cca c  |
| TLR5 R                 | tcc act aca gga gga gaa gcg a  |
| FOXP3 F                | ggc aca atg tct cct cca gag a  |
| FOXP3 R                | cag atg aag cct tgg tca gtg c  |
| TGFB2 F                | aag aag cgt gct ttg gat gcg g  |
| TGFB2 R                | atg ctc cag cac aga agt tgg c  |
| IL-6 F                 | aga cag cca ctc acc tct tca g  |
| IL-6 R                 | ttc tgc cag tgc ctc ttt gct g  |
| IL-8 F                 | ctg gcc gtg gct ctc ttg        |
| IL-8 R                 | ggg tgg aaa ggt ttg gag tat g  |
| TNF- $\alpha$ F        | tca acc tcc tct ctg cca tc     |
| TNF- $\alpha$ R        | cca aag tag acc tgc cca ga     |
| IL-1 $\beta$ F         | aca gat gaa gtg ctc ctt cca    |
| IL-1 $\beta$ R         | gtc gga gat tcg tag ctg gat    |
| NF- $\kappa$ $\beta$ F | gga ttt cgt ttc cgt tat gta tg |
| NF- $\kappa$ $\beta$ R | tcc ttg ggt cca gca gtt a      |

**Table S2. Polydispersity Indexes of B-EVs under various conditions**

|                 | Treatment      | PDI        |
|-----------------|----------------|------------|
| Control         | Fresh          | 0.188±0.01 |
| 7 days          | -80 °C         | 0.231±0.04 |
|                 | -20°C          | 0.345±0.06 |
|                 | 4°C            | 0.215±0.03 |
|                 | 25°C           | 0.291±0.03 |
| 30days          | -80 °C         | 0.26±0.01  |
|                 | -20°C          | 0.407±0.06 |
|                 | 4°C            | 0.255±0.04 |
| Heat treatments | 60°C for 30min | 0.306±0.05 |
|                 | 75°C for 15s   | 0.322±0.01 |
| In vitro        | GS             | 0.316±0.04 |
| digestion       | EP             | 0.298±0.02 |

**Table S3. Comparison of the protein concentrations in EVs isolated from different sources.**

| Species                             | Extraction method             | Protein concentration (µg/mL) |
|-------------------------------------|-------------------------------|-------------------------------|
| Ginger[36]                          | Ultracentrifugation           | 2391.43± 750                  |
| <i>Periplaneta americana</i> L.[41] | Ultracentrifugation           | 2330±440                      |
| <i>Citrus</i> [18]                  | Ultracentrifugation           | 1000                          |
| Blueberry[42]                       | Ultracentrifugation           | 5599.96±132.62                |
| Blueberry                           | Size exclusion chromatography | 482.2±11.2                    |
| <i>Phytophthora capsica</i> [43]    | Ultracentrifugation           | 500                           |

A

Item name: 2  
Channel name: 2: TOF MSe (50-1000) 6eV ESI+ (TIC)

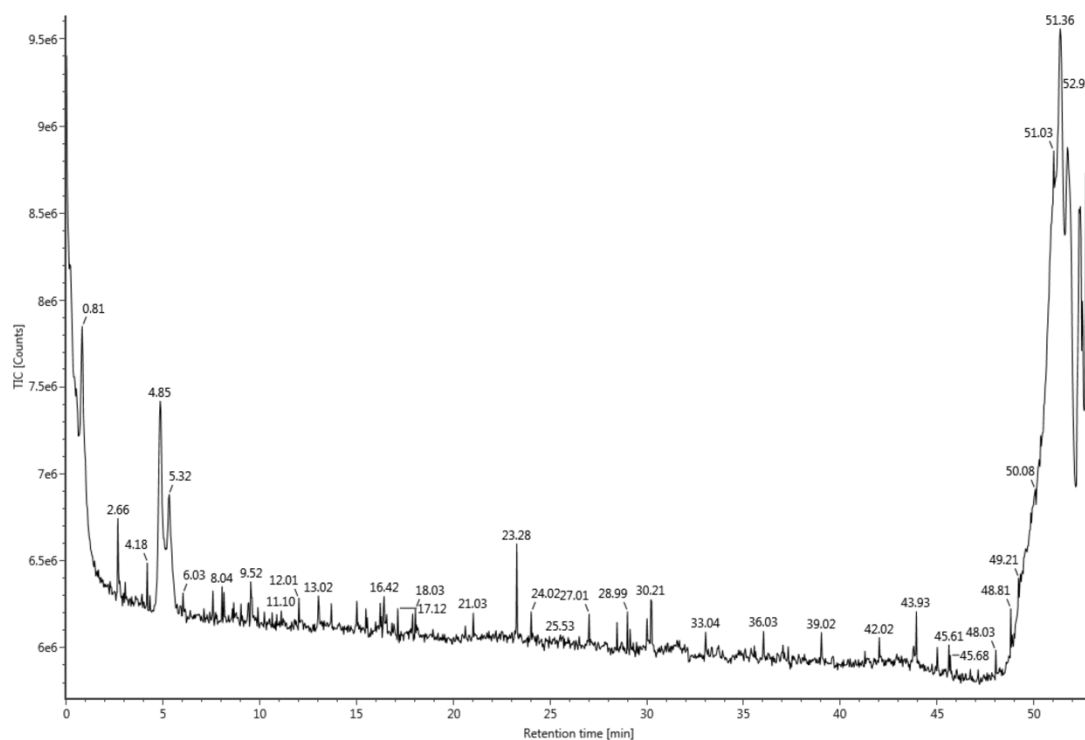

B

Item name: 4  
Channel name: 2: TOF MSe (50-1000) 6eV ESI+ (TIC)

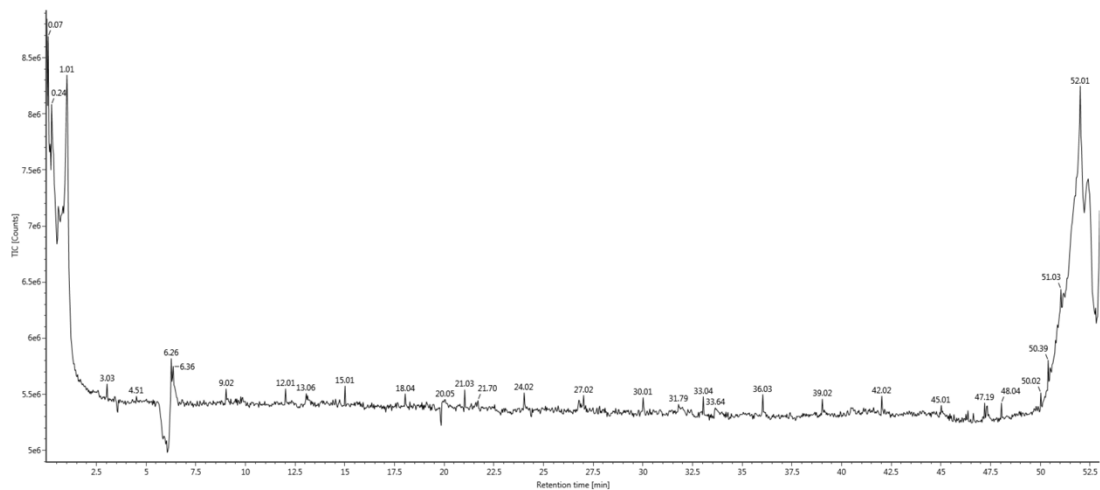

C

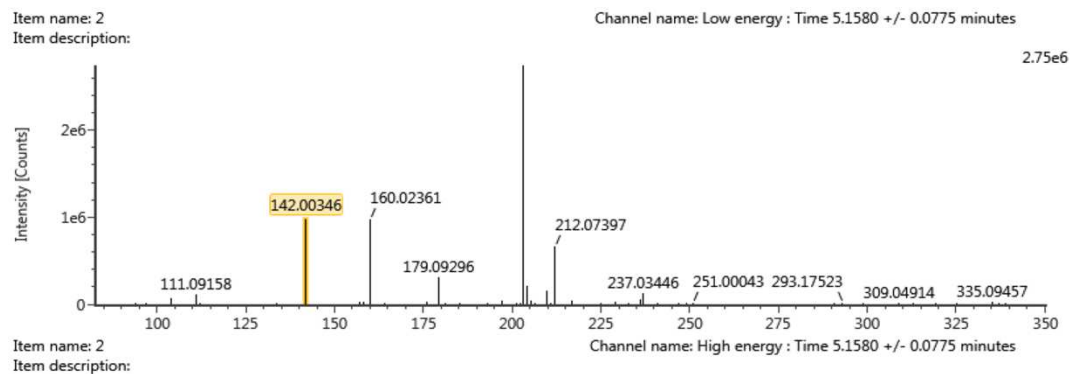

D

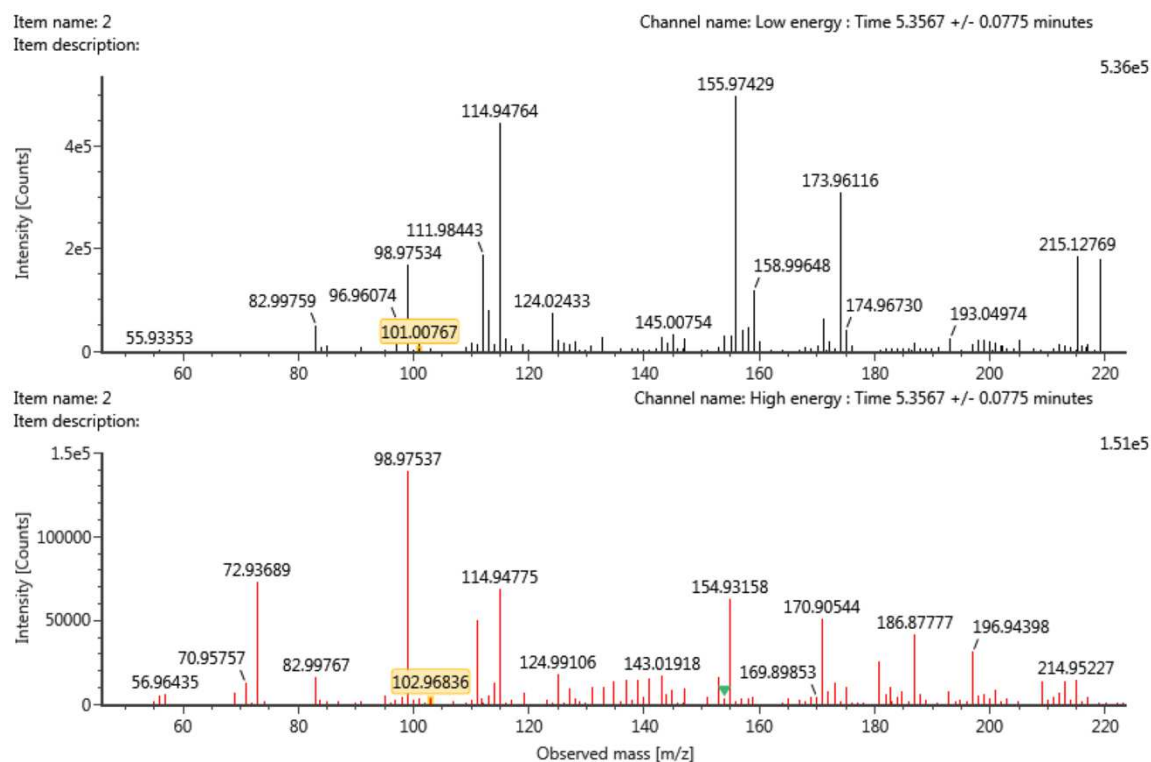

E

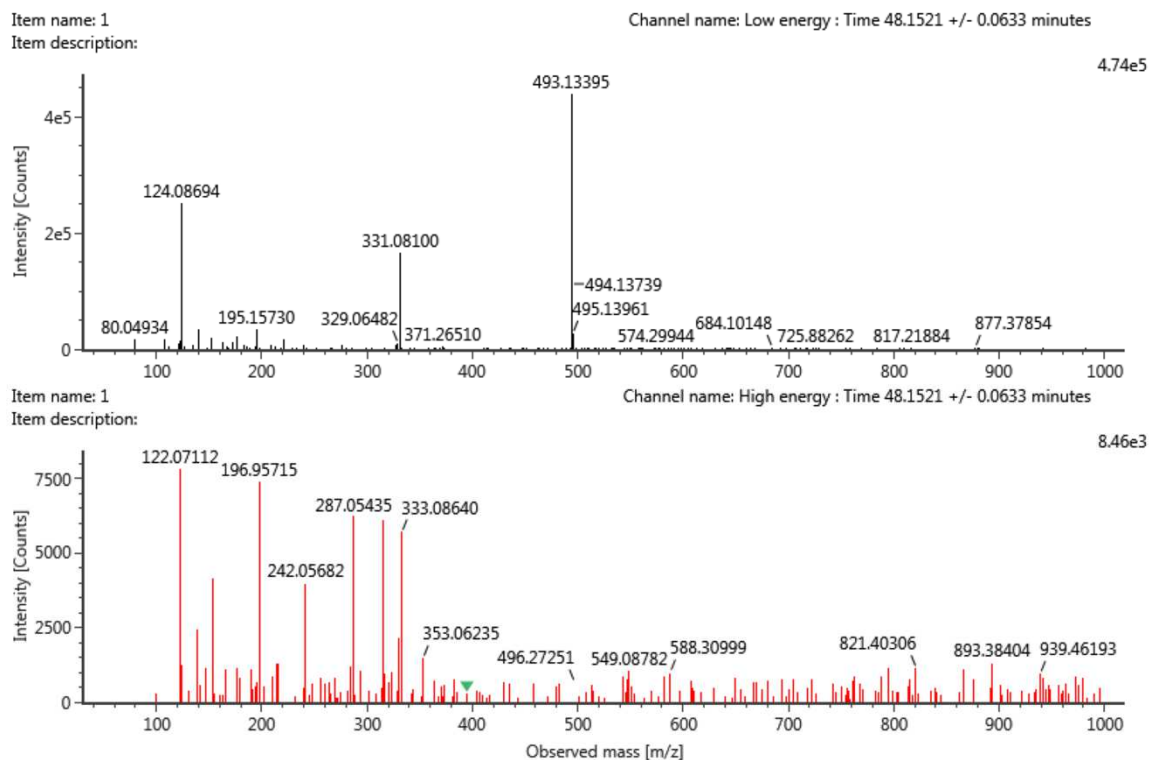

F

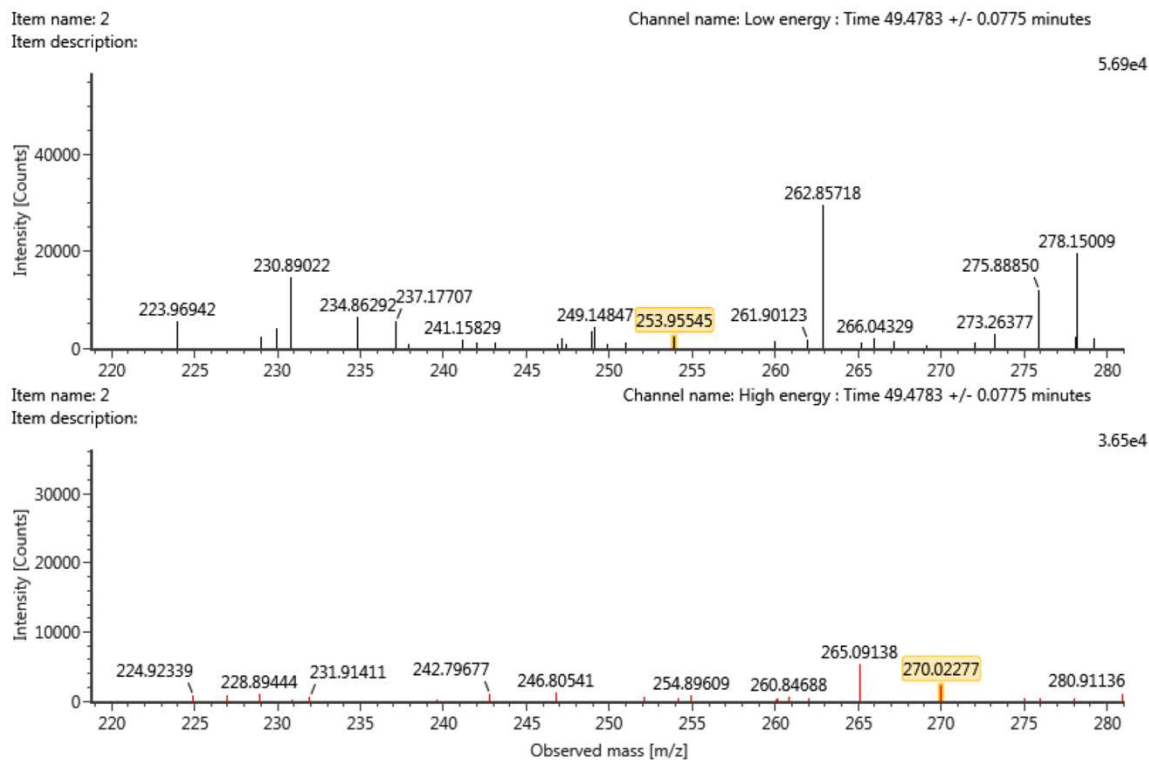

G

Item name: 2  
Item description:

Channel name: Low energy : Time 49.5889 +/- 0.0775 minutes

6.72e6

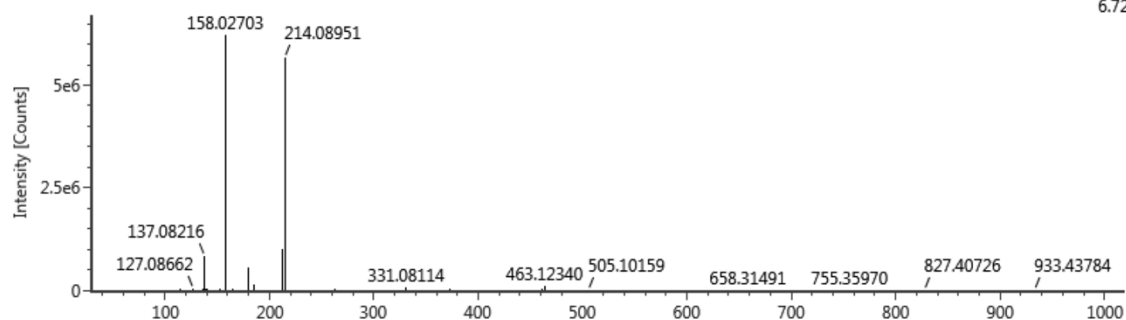

Item name: 2  
Item description:

Channel name: High energy : Time 49.5889 +/- 0.0775 minutes

1.7e4

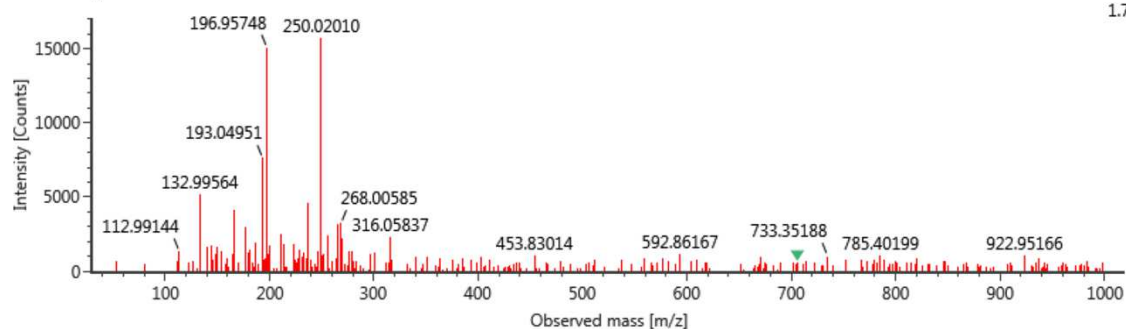

H

Item name: 2  
Item description:

Channel name: Low energy : Time 50.3468 +/- 0.0775 minutes

1.2e6

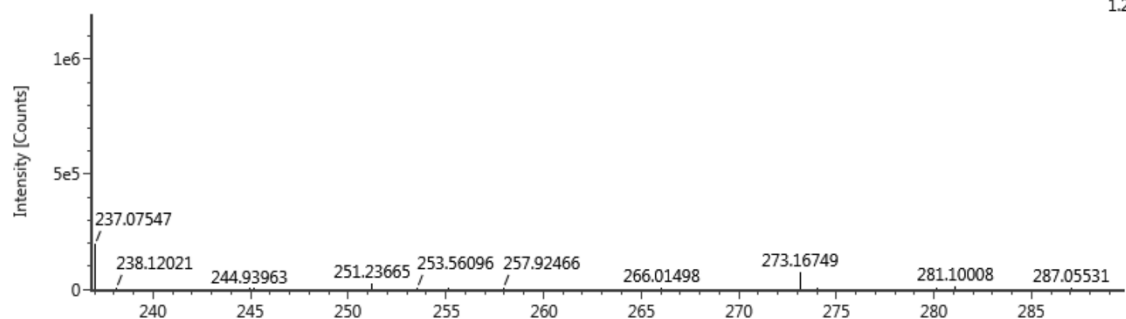

Item name: 2  
Item description:

Channel name: High energy : Time 50.3468 +/- 0.0775 minutes

7.86e4

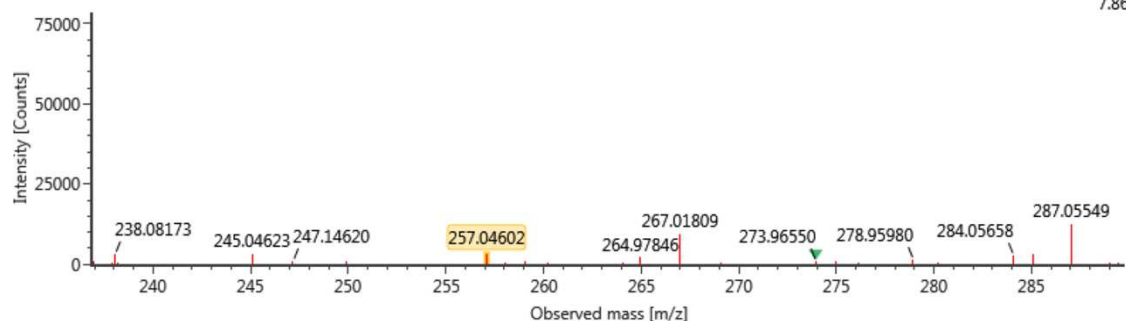

I

Item name: 2  
Item description:

Channel name: Low energy : Time 50.3686 +/- 0.0775 minutes

1.2e6

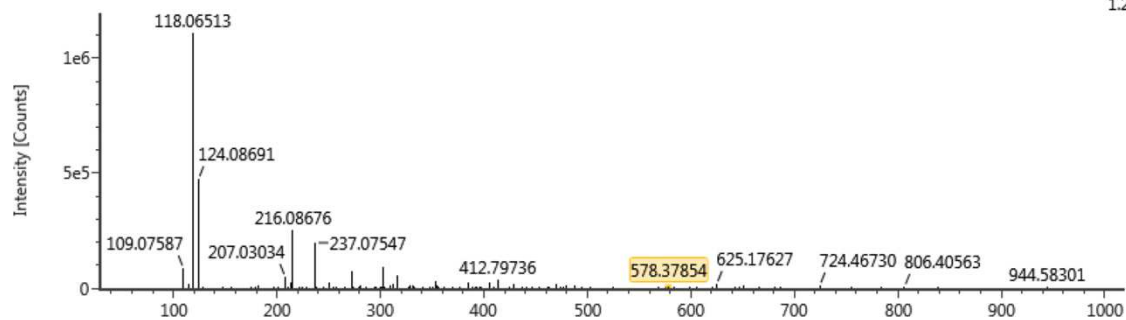

Item name: 2  
Item description:

Channel name: High energy : Time 50.3686 +/- 0.0775 minutes

1.82e5

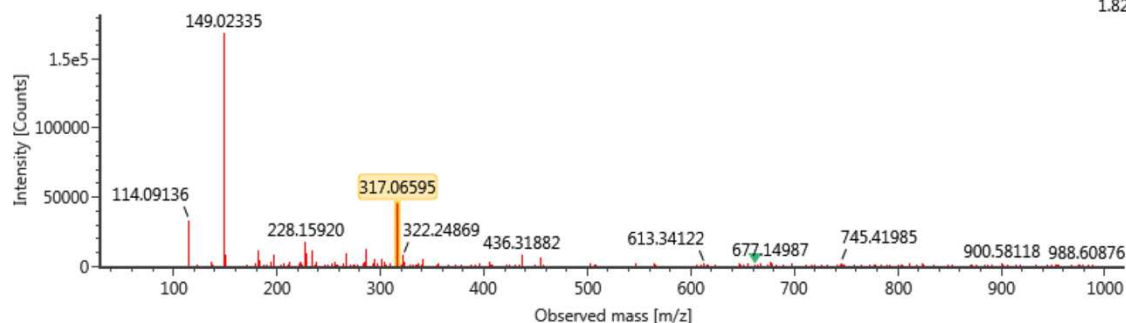

J

Item name: 2  
Item description:

Channel name: Low energy : Time 50.4654 +/- 0.0775 minutes

4.76e6

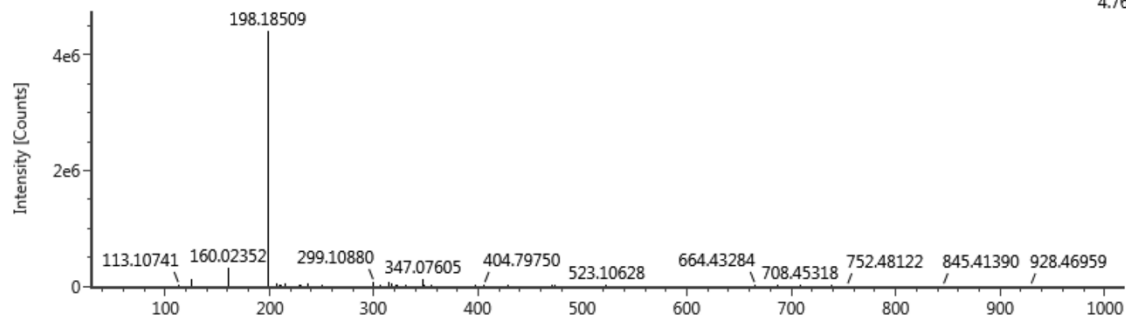

Item name: 2  
Item description:

Channel name: High energy : Time 50.4654 +/- 0.0775 minutes

6.55e4

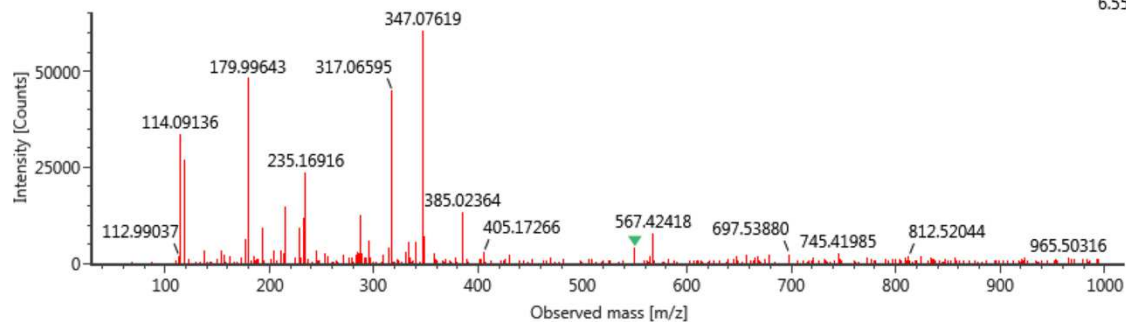

K

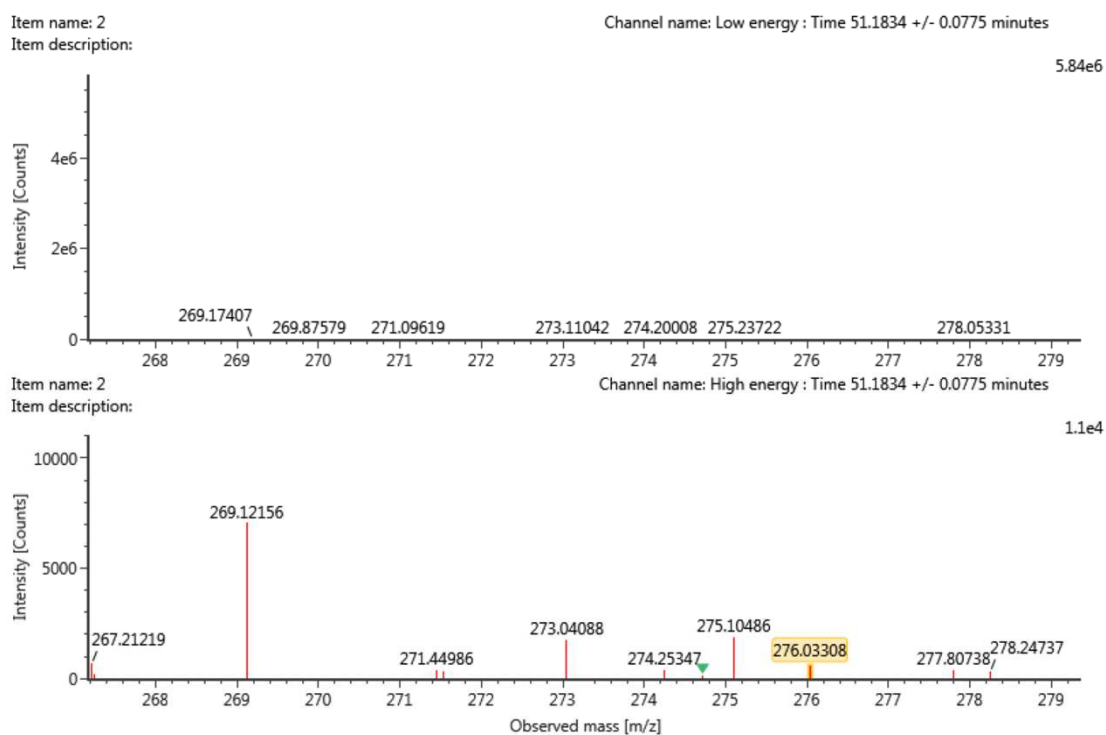

**Figure S1.** (A) The total ion chromatogram of centrifuged blueberry juice (before SEC). (B) The total ion chromatogram of B-EVs. Mass spectrogram of 3-O-Methylgallic acid (C), Coumarin (D), Malvidin 3-O- $\beta$ -D-galactoside (E), Isopeonidin 3-O-arabinoside (F), Malvidin 3-arabinosid (G), 5,6,7,3',4'-Pentahydroxyisoflavone (H), Petunidin- glucoside (I), Luteolin (J), 6-O-Malonylgenistin (K).
